# Supplementary material
Source: Springer Nature journal article supplement (https://www.springermedizin.de/resource/supplementary/12985_2009_732_MOESM3_ESM.pdf/9608372)

**A**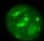**B**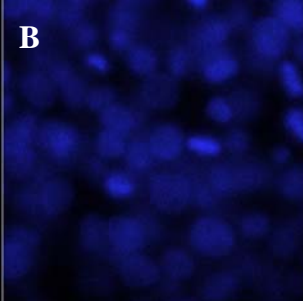**C**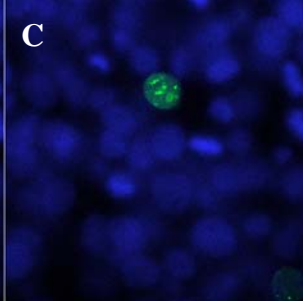**D**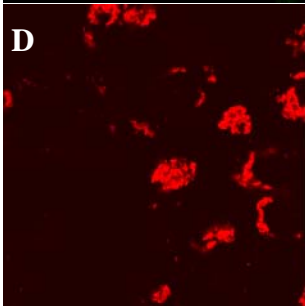**E**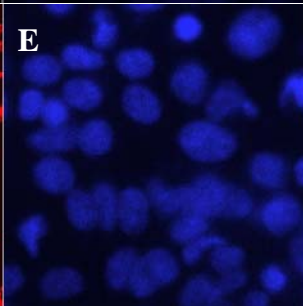**F**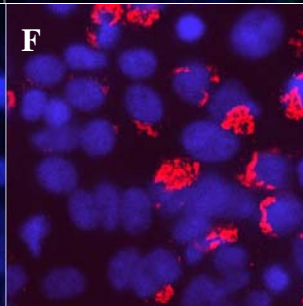**G**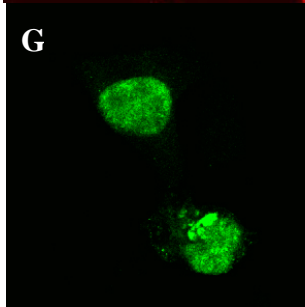**H**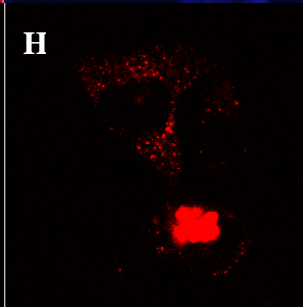**I**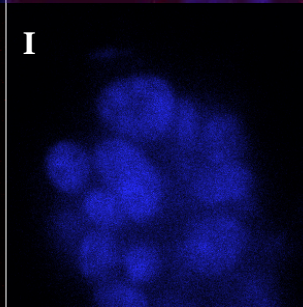**J**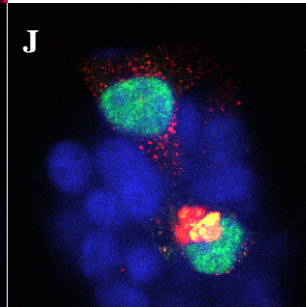

Supplement: MOESM3 [file 9608372]
